# Supplementary material
Source: PubMed Central journal article supplement (PMC1636519)

**A**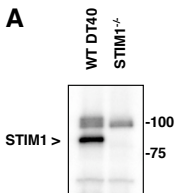**B**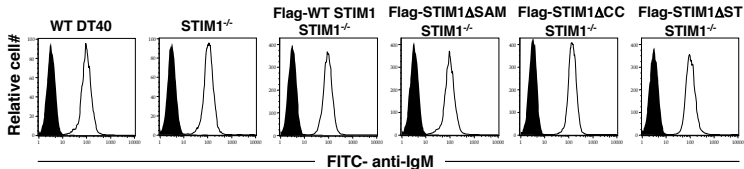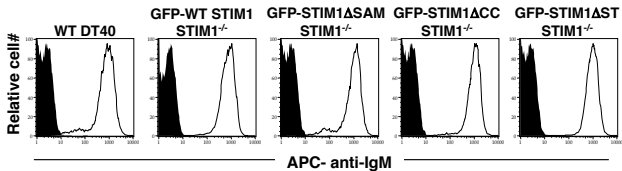

Supplement: pnas_0608358103_1.pdf [file pnas_0608358103_1.pdf]

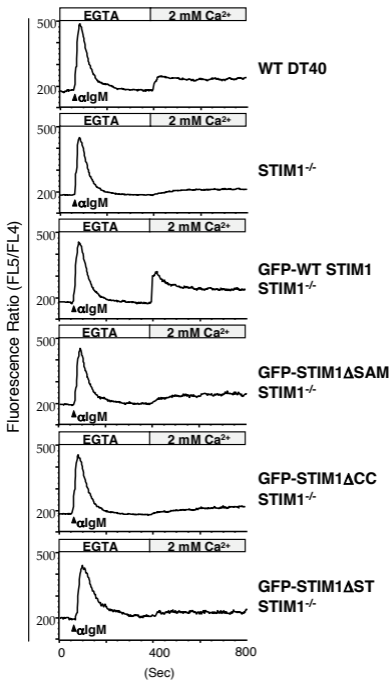

Supplement: pnas_0608358103_2.pdf [file pnas_0608358103_2.pdf]

**A 293T cells**

**+GFP-STIM1**

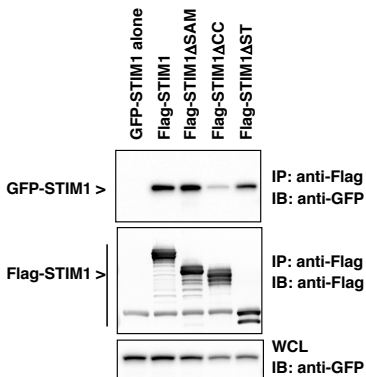

**B. DT40**

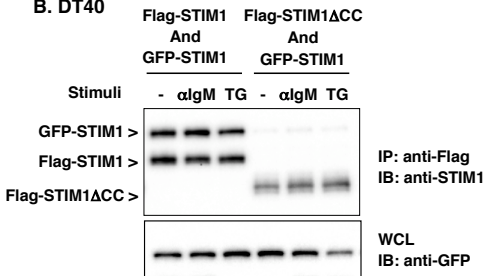

Supplement: pnas_0608358103_3.pdf [file pnas_0608358103_3.pdf]
